# Supplementary material
Source: PubMed Central journal article supplement (PMC4868375)
Supplement: la6b00919_si_001.pdf [file la6b00919_si_001.pdf]

# Supporting Information

## Evaluation of high-yield purification methods on monodisperse PEG-grafted iron oxide nanoparticles

*Andrea Lassenberger,<sup>1</sup> Oliver Bixner,<sup>1</sup> Tilman Grünewald,<sup>2</sup> Helga Lichtenegger,<sup>2</sup> Ronald Zirbs,<sup>1</sup>  
Erik Reimhult<sup>1</sup>*

<sup>1</sup> Department of Nanobiotechnology, Institute for Biologically Inspired Materials, University of Natural Resources and Life Sciences, Muthgasse 11, 1190 Vienna, Austria

<sup>2</sup> Department of Material Science and Process Engineering, Institute of Physics and Materials Science, University of Natural Resources and Life Sciences, Peter-Jordan Strasse 82, 1190 Vienna, Austria

## Materials

Iron(0)pentacarbonyl (99,99% trace metal basis), oleic acid ( $\geq 93\%$  technical grade), dioctyl ether ( $>99\%$ ), dopamine hydrochloride ( $\geq 98\%$ ), sulfuric acid (95-98%), sodium nitrite ( $\geq 99\%$ ), 4-Methyl-morpholine (99% ReagentPlus), (1-Cyano-2-ethoxy-2-oxoethylidenaminoxy)-dimethylamino-morpholino-carbenium hexafluorophosphate (COMU, 97%), hydrochloric acid (37% ACS reagent), Sephadex G75 (superfine), bovine calf serum (sterile filtered, for cell culture) and phosphate buffered saline (PBS 10x concentrate BioPerformance certified) were purchased from Sigma Aldrich, Methoxy-PEG acetic acid (MeO-PEG-COOH, Mw 5000) from JenKem Technology, EtOH ( $>96\%$  technical grade), DMF ( $>99,9\%$  ACS reagent),  $\text{CHCl}_3$  ( $\geq 99.5\%$  containing 100-200ppm amylenes as stabilizer), n-hexane ( $\geq 95\%$  chromasolv plus for HPLC) and petroleum ether (30-50°C bp, p.a.) were obtained from Carl Roth. Ultrapure Milli-Q water (Millipore USA,  $R=18\text{M}\Omega\text{cm}$ ) was used for all experiments. 1000kD MWCO Float-A-Lyzer regenerated cellulose dialysis membranes were purchased from Spectrum Labs Netherlands.

All chemicals were used as received without further purification.

## Experimental Details and spectral data

### Synthesis of oleic acid-capped iron oxide cores

**Table S1.** Iron oxide cores synthesized using a slightly modified method developed by Hyeon et al.<sup>1</sup> Core size was controlled by varying the amount of precursor to surfactant.

| NP diameter (nm) | Fe(CO) <sub>5</sub> : OA (molar ratio) |
|------------------|----------------------------------------|
| 3.5 ± 0.3        | 1:1.6                                  |
| 4.9 ± 0.3        | 1:1.9                                  |
| 7.1 ± 0.4        | 1:2.5                                  |
| 9.6 ± 0.4        | 1:3.9                                  |

### Synthesis of 6-Nitrodopamine-Hemisulfate

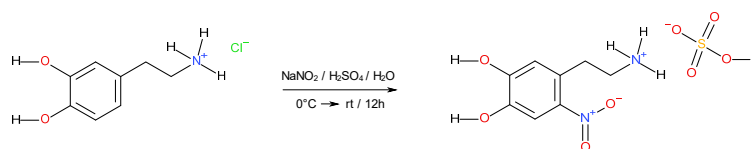

NDA was synthesized using a slightly modified procedure published earlier.<sup>2</sup> 5g dopamine hydrochloride (DA-HCl) and 6.3g sodium nitrite (NaNO<sub>2</sub>) were dissolved in 150mL deionized water and cooled in an ice/NaCl bath. 25mL of 20% sulfuric acid were added dropwise under vigorous stirring to the cooled solution maintaining the temperature below 10°C. After complete addition the reaction mixture was slowly warmed to room temperature and reacted overnight. The resulting yellow precipitate was collected by filtration and washed excessively with ice-cold water, once with MeOH and a 50:50 mixture of EtOH:Et<sub>2</sub>O. NDA-HSO<sub>4</sub> was obtained as an

intense yellow powder in 65% yield. NDA-HCl was characterized by  $^1\text{H}$  and  $^{13}\text{C}$ -NMR, MS, IR and UV/Vis

$^1\text{H}$ -NMR ( $d_6$ -DMSO, 200MHz, ppm): 7.86 (s b, 1H, OH), 7.54 (s, 1H, Ph), 6.80 (s, 1H, Ph), 5.92 (s b, 1H, OH), 3.04 (s, 4H,  $\text{CH}_2$ )

$^{13}\text{C}$ -NMR and DEPT ( $d_6$ -DMSO, 200MHz, ppm): 151.80 (C), 144.63 (C), 139.47 (C), 125.91 (C), 118.47 (CH), 112.52 (CH), 39.52 ( $\text{CH}_2$ ), 30.97 ( $\text{CH}_2$ )

ESI-MS ( $\text{CH}_3\text{CN}/\text{NH}_4^+\text{COO}^-$  m/z (%)):  $[\text{M}]\text{H}^+ = 199.11$  (100); electrostat. aggregates: 397.19 (55), 495.16 (50), 693.24 (20), 791.19 (10), 891.31 (20), 989.26 (35), 1089 (10), 1187.34 (10), 1385.47 (10) (20), 1286.34 (

IR (powder,  $\text{cm}^{-1}$ ): 3479, 3175, 3043, 2946, 1624, 1600, 1540, 1512, 1493, 1437, 1411, 1376, 1338, 1311, 1283, 1251, 1202, 1146, 1068, 1034, 978, 949, 906, 882, 853, 810, 753, 674, 621, 603, 557, 451

UV/VIS (MeOH, nm): 246, 305, 353, 425

### Synthesis of PEG-NDA

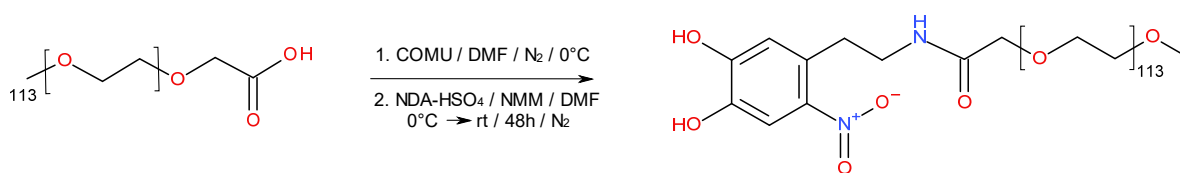

6-Nitrodopamine-poly(ethylene glycol)(5kDa) (NDA-PEG) was synthesized via (1-Cyano-2-ethoxy-2-oxoethylidenaminoxy)-dimethylamino-morpholino-carbenium hexafluorophosphate (COMU) mediated peptide-coupling reactions<sup>3</sup>.

Typically 5 g MeO-PEG(5000)-COOH were dissolved in 30 mL DMF and pre-activated for 30 min at room temperature with 0.64 g COMU. The mixture was purged with  $\text{N}_2$  for 20 min and cooled to  $4^\circ\text{C}$ . 0.24 g of NDA- $\text{H}_2\text{SO}_4$  were dissolved in 2 mL DMF and mixed with 257  $\mu\text{L}$  n-

Methylmorpholine (nMM). After 10 min the amine containing solution was added dropwise to the activated PEG at 4°C under N<sub>2</sub>. The solution was slowly warmed to RT and reacted for 48h. 90mL 3M HCl were added to the mixture and extracted 3x with CHCl<sub>3</sub>. The solvent was removed under reduced pressure and the product was collected as a light yellow powder in 58% yield verified by <sup>1</sup>H-NMR.

<sup>1</sup>H-NMR (CDCl<sub>3</sub>, 300MHz, ppm): 7.65 (s, 1H, Ph), 7.25 (t, 1H, CONH), 6.8 (s, 1H, Ph), 4.2 (s, 2H, CH<sub>2</sub>CONH) 3.65 (t, 452H, EG-CH<sub>2</sub>), 3.40 (s, 6H, OCH<sub>3</sub>)

Functionalization was calculated by comparing the integral ratios of CH<sub>2</sub> from the PEG-backbone to the aryl CH (NDA).

IR (powder, cm<sup>-1</sup>): 2946 (EG-CH<sub>2</sub> str), 2883 (EG-CH<sub>2</sub> str), 2862 (EG-CH<sub>2</sub> str), 2807, 2740, 2694, 1755, 1729 (COOH), 1642 (CONH), 1532 (CONH), 1467 (EG-CH<sub>2</sub> sci, g), 1455 (NO<sub>2</sub>, EG-CH<sub>2</sub> sci, g), 1359 (NO<sub>2</sub>), 1341(EG-CH<sub>2</sub> wag, g), 1279(EG-CH<sub>2</sub> twist), 1240 (EG-CH<sub>2</sub> twist), 1146 (EG-CO, EG-CC str), 1103 (EG-CO, EG-CC str), 1060 (EG-CO, EG-CC str), 957 (EG-CH<sub>2</sub> rock, g), 947 (COOH), 841, 558, 528, 509

### Purification methods - details

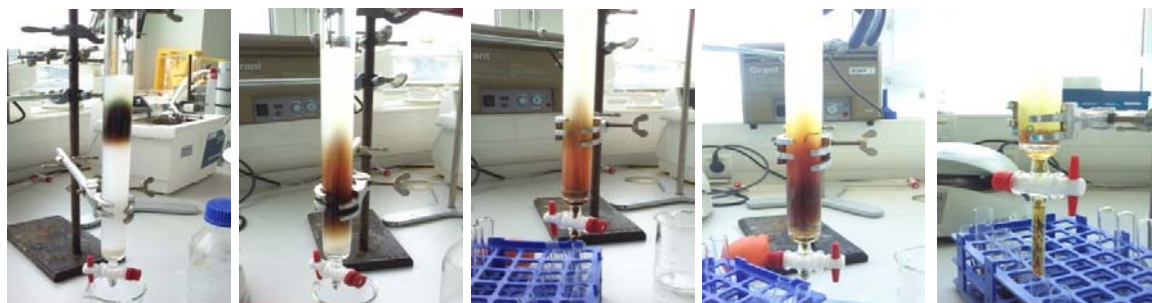

**Figure S1.** Column purification of 7.1 nm superparamagnetic iron oxide nanoparticles with NDA-PEG grafted shells.

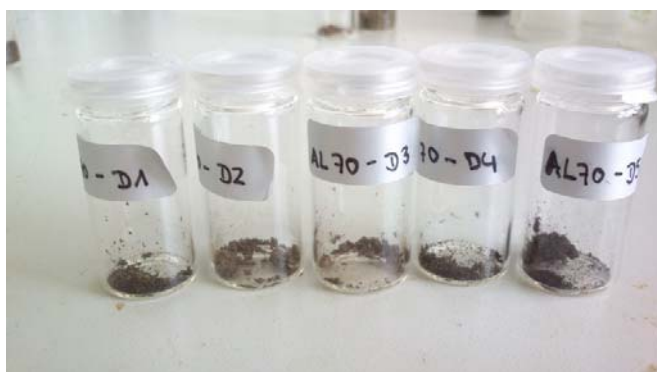

**Figure S2.** Dialyzed NP dispersions after 1h, 2h, 6,5h, 24h and 48h. The color changes from brown to black due to removal of free PEG and results in almost black samples, indicating that also bound NDA-PEG has been ripped off the surface and leaving almost bare cores.

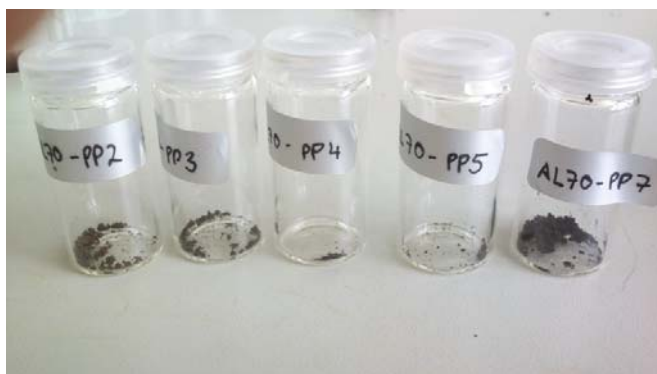

**Figure S3.** NPs purified by repeated precipitation and magnetic decantation. As the purification proceeds, the color of the sample changes to a darker brown which is attributed to the removal of free NDA-PEG.

## Shell Characterization - IR

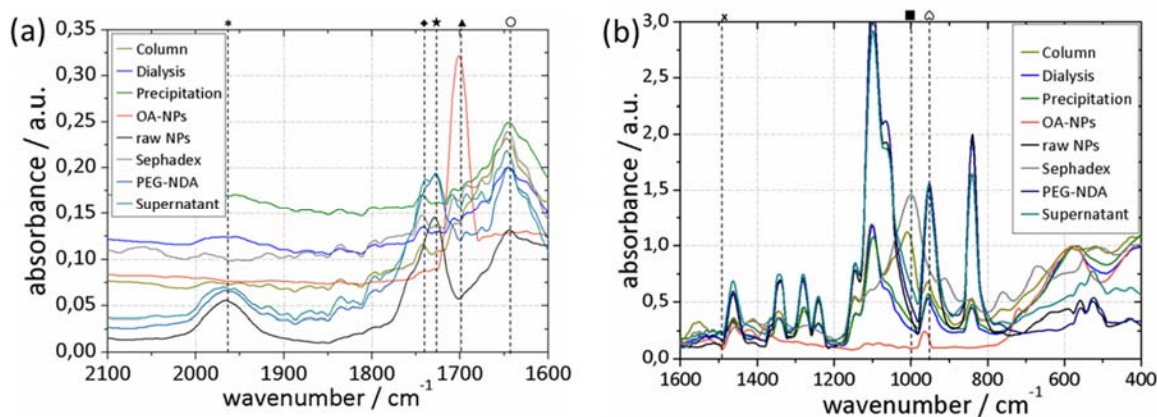

**Figure S4. (a)** High wavenumbers with amide CO-stretch at  $1640\text{ cm}^{-1}$  (o), C=O-stretch of free OA at  $1702\text{ cm}^{-1}$  ( $\Delta$ ), residual COOH from free, non-coupled PEG at  $1728\text{ cm}^{-1}$  ( $\star$ ) found only in supernatants, raw NPs and pure NDA-PEG; bands at  $1740\text{ cm}^{-1}$  can be attributed to COOR bonds of NDA-PEG (+) and the peak at  $1960\text{ cm}^{-1}$  was attributed to a combination vibration OH bend of COOH of unbound PEG-NDA (\*).

**(b)** Low wavenumbers with NP bands ( $780\text{--}400\text{ cm}^{-1}$ ), ((C=O)-OH) stretch from free OA ( $\omega$ ) at  $1702\text{ cm}^{-1}$ , sugar-bands ( $\blacksquare$ ) (COC & CO at  $1130\text{--}974\text{ cm}^{-1}$ ) originating from column material, characteristic  $\text{CH}_2$  ( $1345\text{--}1240$ ;  $<965\text{ cm}^{-1}$ ), and CO/CC( $1144\text{--}1060\text{ cm}^{-1}$ ) vibrations of the PEG backbone and a peak that was attributed to the vibration of  $\text{NO}_2$  of surface-bound PEG at  $1491\text{ cm}^{-1}$  (x).

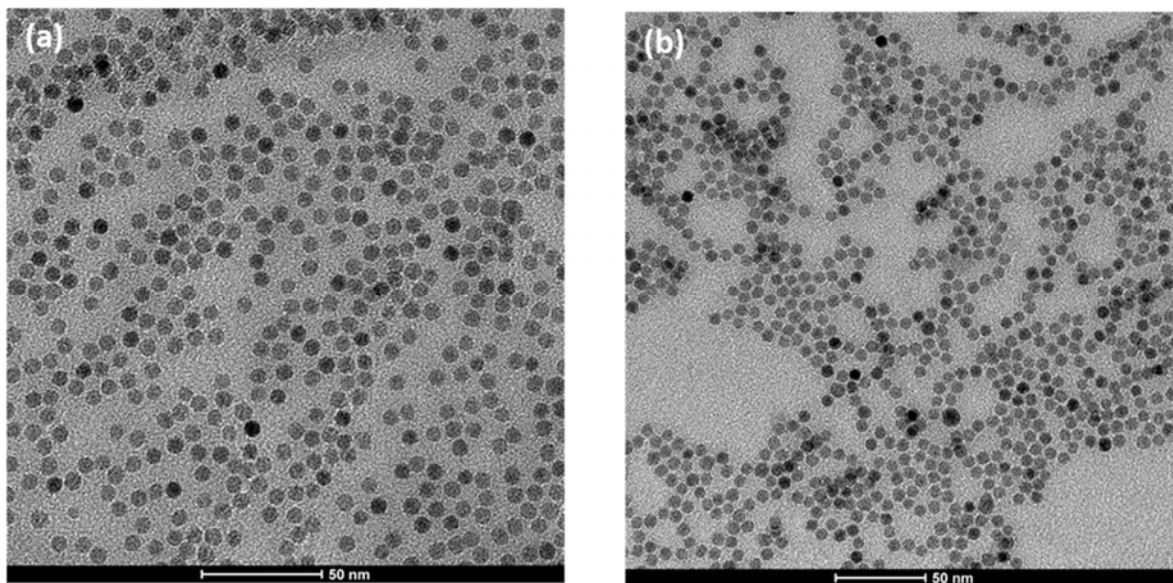

**Figure S5.** TEM micrographs of 7.1 nm NPs dispersed in **(a)** H<sub>2</sub>O and **(b)** PBS at 4mg/mL, stored for 4 months at 4°C. No aggregation occurred after 4 months, the inter-NP distance is comparable to as-prepared NP dispersions

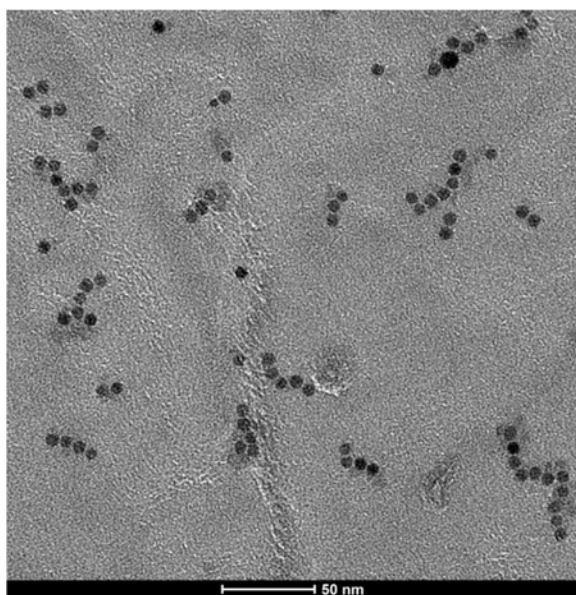

**Figure S6.** TEM micrograph of 7.1 nm NPs in PBS/FCS 10% v/v after 2 month storage. No aggregation is visible, underlining the exceptional stability of the NPs.



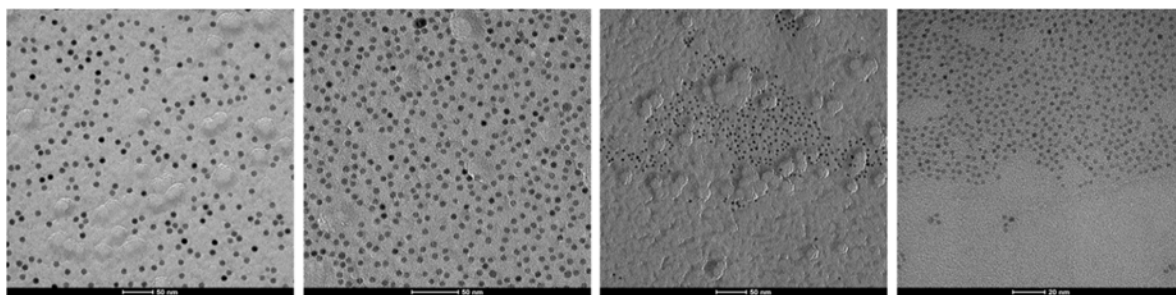

**Figure S7.** TEM micrographs of NPs purified by precipitation. 9.6, 7.1, 4.9 and 3.5 nm (from left to right). The blobs in the 1<sup>st</sup> and 3<sup>rd</sup> image originate from inhomogeneity of the TEM grid-surface.

## References

1. Hyeon, T.; Lee, S. S.; Park, J.; Chung, Y.; Na, H. B., Synthesis of Highly Crystalline and Monodisperse Maghemite Nanocrystallites without a Size-Selection Process. *Journal of the American Chemical Society* **2001**, *123* (51), 12798-12801.
2. (a) Bixner, O.; Lassenberger, A.; Baurecht, D.; Reimhult, E., Complete Exchange of the Hydrophobic Dispersant Shell on Monodisperse Superparamagnetic Iron Oxide Nanoparticles. *Langmuir* **2015**, Ahead of Print; (b) Napolitano, A.; D'Ischia, M.; Costantini, C.; Prota, G., A new oxidation pathway of the neurotoxin 6-aminodopamine. Isolation and characterization of a dimer with a tetrahydro[3,4a]iminoethanophenoxazine ring system. *Tetrahedron* **1992**, *48* (39), 8515-22.
3. (a) El-Faham, A.; Albericio, F., COMU: A third generation of uronium-type coupling reagents. *J. Pept. Sci.* **2010**, *16* (Copyright (C) 2013 American Chemical Society (ACS). All Rights Reserved.), 6-9; (b) El-Faham, A.; Funosas, R. S.; Prohens, R.; Albericio, F., COMU: A Safer and More Effective Replacement for Benzotriazole-Based Uronium Coupling Reagents. *Chem. - Eur. J.* **2009**, *15* (Copyright (C) 2013 American Chemical Society (ACS). All Rights Reserved.), 9404-9416, S9404/1-S9404/34.
